# Supplementary material for: Manganese Benefits Heat-Stressed Corals at the Cellular Level
Source: Frontiers journal article supplement (doi:10.3389/fmars.2021.681119), 2021-06-29
Supplement: Data_Sheet_1.docx [file Data_Sheet_1.docx]

**Supplementary materials**

**
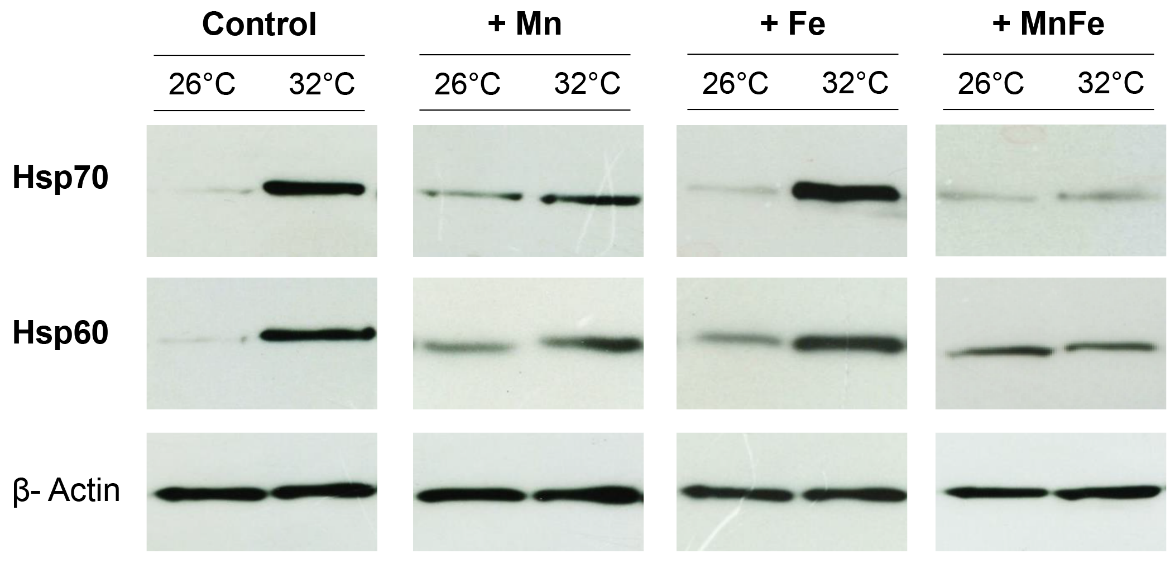
**

**Figure 1 –** Western blots representative of experimental repeats (n = 4) showing the expression of Hsp70, Hsp60 and β-Actin in colonies of *S. pistillata* subjected to the different metal treatments (Control, + Mn, + Fe, + MnFe) and temperatures (26°C and 32°C). The values related to the metal concentrations for each treatment are reported in “Material and Methods”.
